# Supplementary material for: In vivo, in vitro and in silico correlations of four de novo SCN1A missense mutations
Source: PLOS journal article supplement (doi:10.1371/journal.pone.0211901), 2019-02-08
Supplement: S6 (10.1371/journal.pone.0211901.s006) [file journal.pone.0211901.s006]

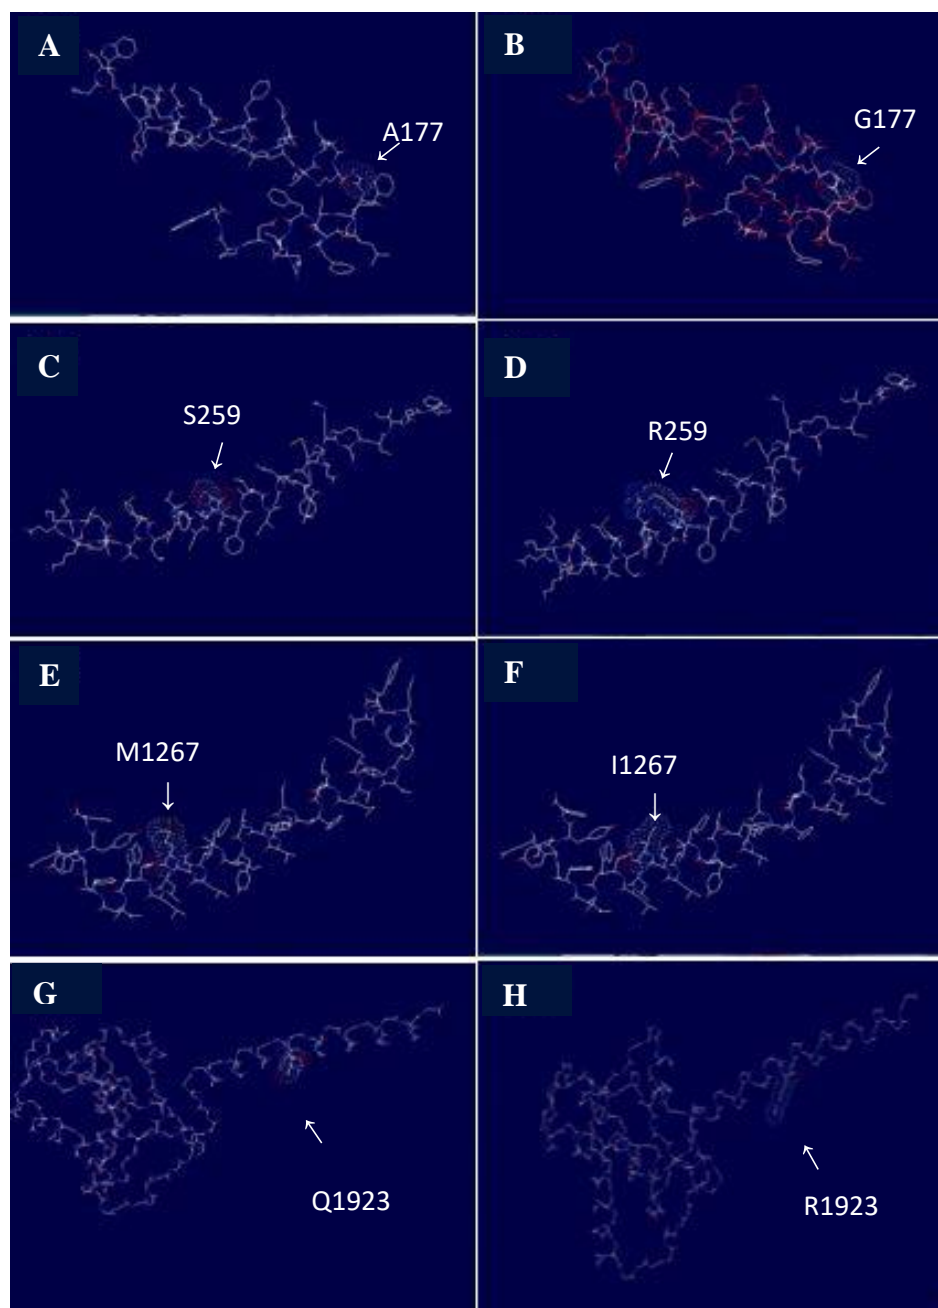

**S5 Fig. Homology modeling.** Homology modeling of WT (A,C,E,G) and mutant Nav1.1 (B,D,F,H).
